# Supplementary material for: An ultra-sensitive selective fluorescent sensor based on a 3D zinc-tetracarboxylic framework for the detection and enrichment of trace Cu2+ in aqueous media
Source: Royal Society of Chemistry journal article supplement (doi:10.1039/d0dt04370b), 2021-01-01
Supplement: d0dt04370b1.pdf [file d0dt04370b1.pdf]

# An ultra-sensitive selective fluorescence sensor based on a 3D zinc-tetracarboxylic framework for the detection and enrichment of trace Cu<sup>2+</sup> in aqueous media

Mei-Rong Han<sup>a†</sup>, Wen-Xia Dong<sup>c†</sup>, Si-Si Feng<sup>a,b\*</sup>, Li-Ping Lu<sup>a,b\*</sup>, Zhong-Ping Li<sup>c\*</sup>

<sup>a</sup>*Institute of Molecular Science, Key Laboratory of Chemical Biology and Molecular Engineering of the Education Ministry, Shanxi University, Taiyuan, Shanxi, 030006, P. R. China.*

<sup>b</sup>*Key Laboratory of Materials for Energy Conversion and Storage of Shanxi Province, Shanxi University, Taiyuan, Shanxi, 030006, P. R. China.*

<sup>c</sup>*Institute of Environmental Science, School of Chemistry and Chemical Engineering, Shanxi University, Taiyuan, Shanxi, 030006, P. R. China.*

\*Corresponding author. E-mail: [ssfeng@sxu.edu.cn](mailto:ssfeng@sxu.edu.cn) & [luliping@sxu.edu.cn](mailto:luliping@sxu.edu.cn)

## Experimental Section

### *Material and measurement*

All reagents and solvents were purchased from commercial sources and used without further purification. The IR spectra were recorded from KBr pellets in the range of 4000-400 cm<sup>-1</sup> on a Bruker TENSOR27 Spectrometer. Elemental analysis (EA) was carried out using a CHNO-Rapid instrument. Powder X-ray diffractions (PXRD) were recorded on a Rigaku Smartlab X-ray diffractometer with Cu-K $\alpha$  radiation ( $\lambda = 1.5406 \text{ \AA}$ ) in the range of 5–50° in  $2\theta$  at a rate of 5°/min. The thermogravimetric (TG) study was carried out on a Dupont thermal analyzer with a temperature range of 25-800 °C under N<sub>2</sub> flow with a heating rate of 10 °C min<sup>-1</sup>. The luminescence spectra were recorded on a PTI Quanta Master-400 Spectrofluorometer with a xenon arc lamp as the light source. The pass width of 5 nm was used in the measurement of emission and 5 nm for excitation spectra, and all the measurements were performed under the same experimental conditions. UV-vis diffuse reflectance spectroscopy (DRS) was performed by using a TU-1950 UV-vis spectrophotometer, during which BaSO<sub>4</sub> was adopted as the internal reflectivity standard. The UV-visible spectra were recorded with a JASCO V-570 spectrophotometer. Luminescence lifetime measurements were carried out on an Edinburgh Instruments Fluorescence Lifetime spectrometer 980 (FLS 980), and the quantum yields were measured on a Hamamatsu Absolute PL Quantum Yield spectrometer C9920-02G. The accurate elemental ratio of Zn/Cu was determined using an Agilent inductively coupled plasma atomic emission spectrometer 730 (ICP-OES 730). The X-ray photoelectron spectroscopy (XPS) data were obtained from electronic spectrometer (Shimadzu Japan).

### *X-ray crystal structure determination*

Single-crystal X-ray diffraction data for **1** were collected on the Beijing Synchrotron Radiation Facility (BSRF) beamline 1W2B, which was equipped with a MAR CCD-165 detector ( $\lambda = 0.7200$

Å) with the storage ring working at 2.5 GeV at 100(2) K. Data were collected using the MARCCD equipment and processed using the HKL2000 program<sup>[38]</sup>. The structure was solved *via* direct methods employed in the *SHELXS-2014* program and refined by full-matrix least squares methods against  $F^2$  with *SHELXL-2014*<sup>[39]</sup>. After all non-H atoms were refined anisotropically, hydrogen atoms attached to C atoms were placed geometrically and refined using a riding model approximation, with C-H = 0.93 Å and  $U_{\text{iso}}(\text{H}) = 1.2U_{\text{eq}}(\text{C})$ . Hydrogen atoms in hydroxyl and water molecules were located from difference Fourier maps and refined using their global  $U_{\text{iso}}$  value with O-H = 0.82 Å. The residual density map showed an over-assignment at the Zn2 site, so it was checked by experiments. Firstly, there was no copper source in the synthesis of complex **1**; Secondly, ICP and XPS results of the complex showed that there was no copper in it. Therefore, radiation damage in the synchrotron beam is the likely cause, especially since it occurs at the Zn2 ion located on a centre of symmetry, which has two water molecules bound to it and is therefore more susceptible to radiation damage. Crystallographic data in CIF format are deposited with the Cambridge Crystallographic Data Center as CCDC 2031935 for **1**. Crystal data and structure refinement details were summarized in Table 1.

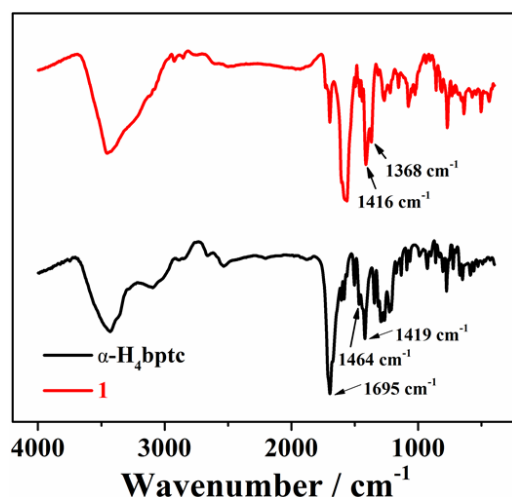

Fig. S1 FT-IR spectra of MOF **1** and H<sub>4</sub>bptc ligand.

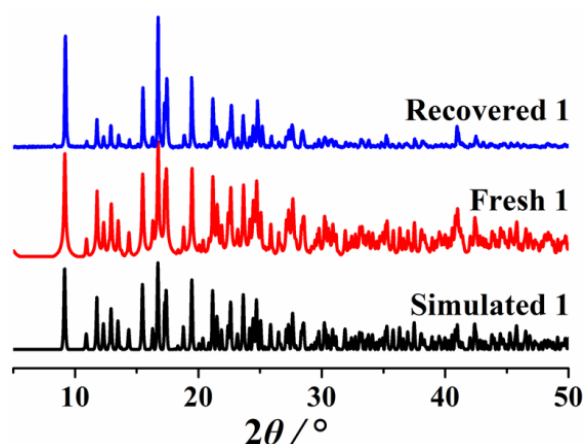

Fig. S2 The PXRD patterns of MOF **1** (simulated, fresh and recovered) at room temperature.

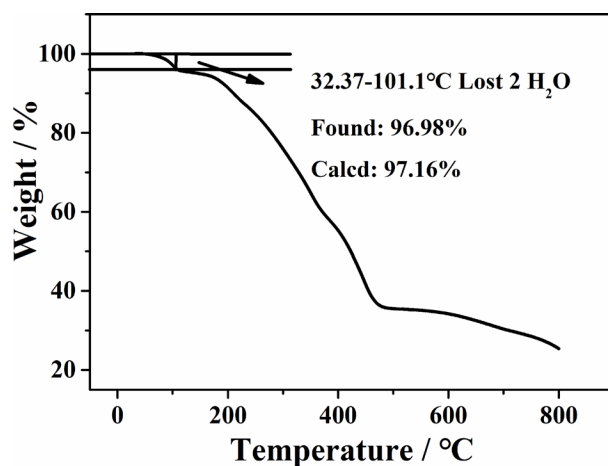

Fig. S3 TG traces of MOF 1 ranging from room temperature to 800 °C.

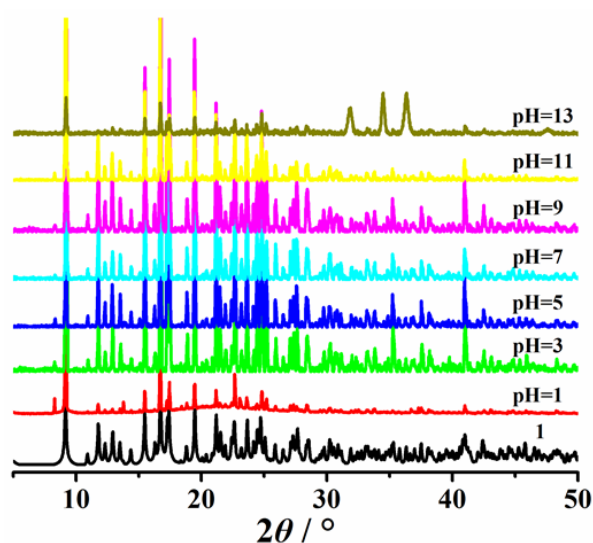

Fig. S4 The PXRD patterns of MOF 1 after being immersed in aqueous solutions at pH = 1, 3, 5, 7, 9, 11, 13 (24 h).

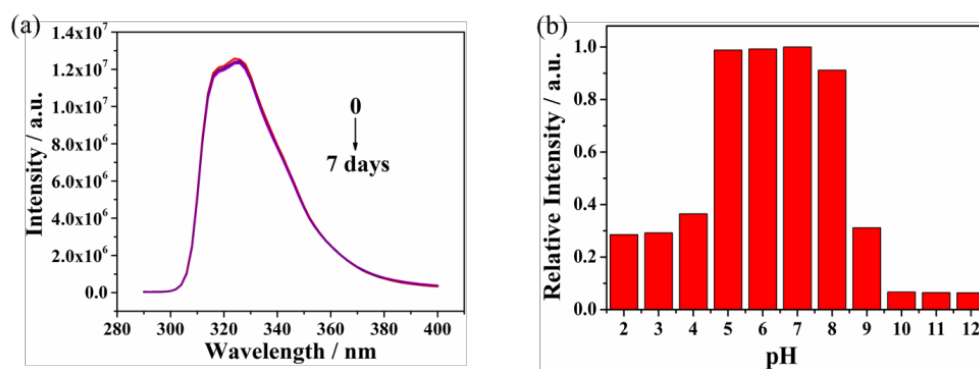

Fig. S5 Emission spectra of MOF 1 (a) in aqueous solution for 7 days; (b) in a series of aqueous solutions with pH values ranging from 2.0 to 12.0 for 24 hours.

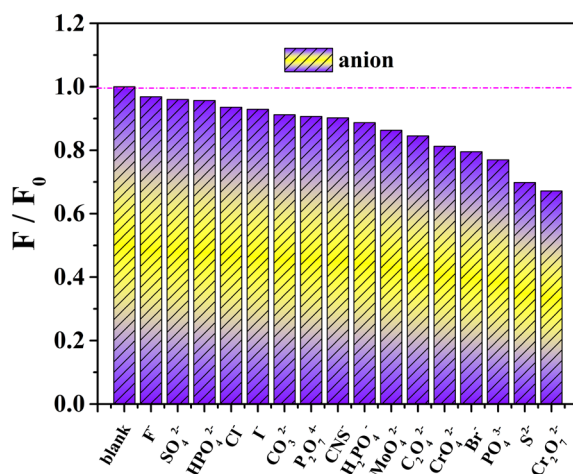

**Fig. S6** Luminescence intensities of **1** in the presence of different anions with the concentration of 80  $\mu\text{M}$ .

**Table S1.** Comparison of Various MOFs Sensors for the Detection of  $\text{Cu}^{2+}$ .

| Sensor                                                                                                                                                          | Linear range( $\mu\text{M}$ )          | Type ( $\text{M}^{-1}$ ) | $K$ ( $\text{M}^{-1}$ )               | LOD (nM)                                                                                          | Media                                                    | Refs                 |
|-----------------------------------------------------------------------------------------------------------------------------------------------------------------|----------------------------------------|--------------------------|---------------------------------------|---------------------------------------------------------------------------------------------------|----------------------------------------------------------|----------------------|
| UiO-66(OH) <sub>2</sub> @PCN-224                                                                                                                                | 0–10                                   | off                      | $4.03 \times 10^5$                    | 0.068                                                                                             | CH <sub>3</sub> OH:<br>H <sub>2</sub> O<br>(v:v=<br>1:1) | S1                   |
| BPEI-CQDs/ZIF-8                                                                                                                                                 | 0.002–1                                | off                      | $3.688 \times 10^5$                   | 0.08                                                                                              | pH=8<br>PBS                                              | S2                   |
| MOF-525                                                                                                                                                         | 0.01–0.25                              | off                      | $2.56 \times 10^7$                    | 0.22                                                                                              | pH=7.4<br>HEPES                                          | S3                   |
| SiO <sub>2</sub> @ZIF-8                                                                                                                                         | 0.01–0.5                               | off                      | $1.83 \times 10^6$                    | 3.8                                                                                               | HEPES                                                    | S4                   |
| <b>[Zn<sub>3</sub>(<math>\mu_3</math>-Hbptc)<sub>2</sub>(<math>\mu_2</math>-4,4'-bpy)<sub>2</sub>(H<sub>2</sub>O)<sub>4</sub>]<sub>n</sub>·2nH<sub>2</sub>O</b> | <b>0–0.7</b>                           | <b>off</b>               | <b><math>1.641 \times 10^5</math></b> | <b>32.4</b>                                                                                       | <b>pH=7.4<br/>HEPES</b>                                  | <b>This<br/>Work</b> |
| PCN-222-Pd(II)                                                                                                                                                  | 0.05–2                                 | on                       | –                                     | 50                                                                                                | H <sub>2</sub> O                                         | S5                   |
| MOF-525                                                                                                                                                         | $3.4 \times 10^6$ –<br>$4 \times 10^7$ | off                      | $4.5 \times 10^5$                     | 67                                                                                                | H <sub>2</sub> O                                         | S6                   |
| [Ca(H <sub>2</sub> tcbpe-F)(H <sub>2</sub> O) <sub>2</sub> ]                                                                                                    | 0.5–4                                  | off                      | $4.39 \times 10^5$                    | 130                                                                                               | H <sub>2</sub> O                                         | S7                   |
| Eu <sup>3+</sup> @Bio-MOF-1                                                                                                                                     | 0–250                                  | ratio<br>metri<br>c      | $6.167 \times 10^5$                   | Cu <sup>2+</sup> /S <sup>2-</sup><br>140/<br>$1.3 \times 10^3$                                    | H <sub>2</sub> O                                         | S8                   |
| [Tb <sub>2</sub> (DCSAL) <sub>3</sub> (H <sub>2</sub> O) <sub>11</sub> ]<br>3DCSAL·4H <sub>2</sub> O                                                            | 3–50                                   | off                      | $4.8 \times 10^4$                     | 170                                                                                               | acetonitr<br>ile                                         | S9                   |
| Tb <sup>3+</sup> @UiO-66-(COOH) <sub>2</sub>                                                                                                                    | 0–200                                  | off                      | $4.12 \times 10^4$                    | 230                                                                                               | H <sub>2</sub> O                                         | S10                  |
| UiO-66-NH-BT                                                                                                                                                    | 0–80                                   | off                      | $1.1 \times 10^5$                     | Cu <sup>2+</sup> /Cr <sub>2</sub> O <sub>7</sub> <sup>-</sup> /<br>CrO <sub>4</sub> <sup>2-</sup> | H <sub>2</sub> O                                         | S11                  |

|                                                                                                                                                                  |                                    |     |                                |                                                                                                                                   |                                           |     |
|------------------------------------------------------------------------------------------------------------------------------------------------------------------|------------------------------------|-----|--------------------------------|-----------------------------------------------------------------------------------------------------------------------------------|-------------------------------------------|-----|
|                                                                                                                                                                  |                                    |     |                                | 266/1.3×10 <sup>3</sup> /<br>411                                                                                                  |                                           |     |
| [Eu <sub>2</sub> (MTBC)(OH) <sub>2</sub> (DMF) <sub>3</sub> (H <sub>2</sub> O) <sub>4</sub> ]·2DMF·7H <sub>2</sub> O                                             | 0–<br>7.87×10 <sup>3</sup>         | off | 2.2514×10 <sup>3</sup>         | Cu <sup>2+</sup> /UO <sub>2</sub> <sup>2+</sup><br>270.7/<br>1.1451×10 <sup>3</sup>                                               | DMF:<br>H <sub>2</sub> O<br>(v:v=<br>1:1) | S12 |
| (Ln-CPN)AMP-Tb                                                                                                                                                   | 1.5–24                             | off | 2.4×10 <sup>4</sup>            | 300                                                                                                                               | pH=7.4<br>HEPES                           | S13 |
| [Cd(H <sub>2</sub> ttac)bpp] <sub>n</sub>                                                                                                                        | –                                  | off | –                              | 630                                                                                                                               | DMF                                       | S14 |
| {[Zn <sub>2</sub> Na(L)(HL) <sub>2</sub> (H <sub>2</sub> O) <sub>2</sub> ]<br>[OAc]·2H <sub>2</sub> O} <sub>n</sub>                                              | 0.5–<br>1.2×10 <sup>3</sup>        | off | 7.75×10 <sup>4</sup>           | 650                                                                                                                               | H <sub>2</sub> O                          | S15 |
| Eu <sup>3+</sup> @MOF-253                                                                                                                                        | 0–100                              | off | 1.0975×10 <sup>4</sup>         | 660                                                                                                                               | H <sub>2</sub> O                          | S16 |
| [Ca(H <sub>2</sub> tcupe)(H <sub>2</sub> O) <sub>2</sub> ]                                                                                                       | 2.5–25                             | off | 1.56×10 <sup>5</sup>           | 790                                                                                                                               | H <sub>2</sub> O                          | S7  |
| ZnMGO                                                                                                                                                            | 1–70                               | off | 3.07×10 <sup>4</sup>           | 1×10 <sup>3</sup>                                                                                                                 | H <sub>2</sub> O                          | S17 |
| [Tb <sub>3</sub> (L) <sub>2</sub> (HCOO)(H <sub>2</sub> O) <sub>5</sub> ]<br>·DMF·4H <sub>2</sub> O                                                              | 1–10 <sup>4</sup>                  | off | 2.0218×10 <sup>3</sup>         | 1×10 <sup>3</sup>                                                                                                                 | pH=7<br>HEPES                             | S18 |
| {[Eu <sub>2</sub> K <sub>2</sub> (dcppa) <sub>2</sub> (H <sub>2</sub> O) <sub>6</sub> ]<br>5H <sub>2</sub> O} <sub>n</sub>                                       | 0–10 <sup>4</sup>                  | off | 5.2 × 10 <sup>4</sup>          | Cu <sup>2+</sup> /Fe <sup>3+</sup><br>1×10 <sup>3</sup> /5×10 <sup>3</sup>                                                        | EtOH                                      | S19 |
| {[Cd(μ <sub>3</sub> -HL) <sub>2</sub> (H <sub>2</sub> O)]·2.3<br>H <sub>2</sub> O} <sub>n</sub>                                                                  | 0–1.8×10 <sup>3</sup>              | off | 5.6×10 <sup>6</sup>            | 1.07×10 <sup>3</sup>                                                                                                              | H <sub>2</sub> O                          | S20 |
| MIL-101-NH <sub>2</sub>                                                                                                                                          | 10–10 <sup>4</sup>                 | off | 1.555×10 <sup>4</sup>          | Cu <sup>2+</sup> /Fe <sup>3+</sup> /<br>Pb <sup>2+</sup><br>1.6×10 <sup>3</sup> /1.8×<br>10 <sup>3</sup> /<br>5.2×10 <sup>3</sup> | pH=5<br>H <sub>2</sub> O                  | S21 |
| [Ce(1,5-NDS) <sub>1.5</sub> (H <sub>2</sub> O) <sub>5</sub> ] <sub>n</sub>                                                                                       | 5–100                              | off | 7.668×10 <sup>3</sup>          | 3×10 <sup>3</sup>                                                                                                                 | H <sub>2</sub> O                          | S22 |
| Cd(INA)(pytpy)(OH)·2H <sub>2</sub> O                                                                                                                             | 0–12                               | off | 1.3 × 10 <sup>5</sup>          | 3.98×10 <sup>3</sup>                                                                                                              | H <sub>2</sub> O                          | S23 |
| Tb(BTC)(H <sub>2</sub> O) <sub>1.5</sub> ·(DMF)<br>@silk fiber                                                                                                   | 10–10 <sup>3</sup>                 | off | 1.192×10 <sup>3</sup>          | 7.87×10 <sup>3</sup>                                                                                                              | H <sub>2</sub> O                          | S24 |
| Eu(FBPT)(H <sub>2</sub> O)(DMF)                                                                                                                                  | –                                  | off | –                              | 1×10 <sup>4</sup>                                                                                                                 | DMF                                       | S25 |
| [H <sub>2</sub> N(CH <sub>3</sub> ) <sub>2</sub> ][Eu <sub>3</sub> (L <sub>1</sub> ) <sub>2</sub> (H<br>COO) <sub>2</sub> (DMF) <sub>2</sub> (H <sub>2</sub> O)] | –                                  | off | 2.35×10 <sup>3</sup><br>±40    | 1×10 <sup>4</sup>                                                                                                                 | DMF                                       | S26 |
| [Eu(pdc) <sub>1.5</sub> (DMF)]·(DM<br>F)·0.5(H <sub>2</sub> O) <sub>0.5</sub>                                                                                    | 10 <sup>3</sup> –6×10 <sup>3</sup> | off | 2.146×10 <sup>3</sup><br>±65   | 1×10 <sup>4</sup>                                                                                                                 | DMF                                       | S27 |
| {[Mg <sub>3</sub> (ndc) <sub>2.5</sub> (HCO <sub>2</sub> ) <sub>2</sub> (H<br>2O)][NH <sub>2</sub> Me <sub>2</sub> ·2H <sub>2</sub> O·DM<br>F]}                  | 0–10 <sup>4</sup>                  | off | 1.986×10 <sup>3</sup>          | 1×10 <sup>4</sup>                                                                                                                 | EtOH                                      | S28 |
| InPCF-1                                                                                                                                                          | 100–<br>2.8×10 <sup>3</sup>        | off | 1.84×10 <sup>3</sup> ±<br>45.9 | 1×10 <sup>4</sup>                                                                                                                 | DMF                                       | S29 |

|                                                                                                                                                                                |                                    |                     |                              |                                                                                                                                           |                    |     |
|--------------------------------------------------------------------------------------------------------------------------------------------------------------------------------|------------------------------------|---------------------|------------------------------|-------------------------------------------------------------------------------------------------------------------------------------------|--------------------|-----|
| [Eu(HL)(L)(H <sub>2</sub> O) <sub>2</sub> ] <sub>2</sub> ·2H <sub>2</sub> O                                                                                                    | 10 <sup>3</sup> –5×10 <sup>3</sup> | off                 | 1.163×10 <sup>3</sup><br>±52 | 1×10 <sup>4</sup>                                                                                                                         | EtOH               | S30 |
| MIL-53-L                                                                                                                                                                       | 0–500                              | off                 | 6.15×10 <sup>3</sup>         | 1×10 <sup>4</sup>                                                                                                                         | H <sub>2</sub> O   | S31 |
| H <sub>2</sub> [Dy <sub>2</sub> (PABA) <sub>4</sub> (bpy) <sub>2</sub> (NO <sub>3</sub> ) <sub>2</sub> ](bpy) <sub>2</sub> (EtOH) <sub>2</sub> (NO <sub>3</sub> ) <sub>2</sub> | –                                  | off                 | –                            | 1×10 <sup>4</sup>                                                                                                                         | H <sub>2</sub> O   | S32 |
| [Cd <sub>2</sub> (L)(OH)(H <sub>2</sub> O) <sub>2</sub> ]                                                                                                                      | 0–50                               | off                 | 3.09×10 <sup>4</sup>         | Cu <sup>2+</sup> /Cr <sub>2</sub> O <sub>7</sub> <sup>2-</sup><br>1.048×10 <sup>4</sup> /<br>3.917×10 <sup>3</sup>                        | H <sub>2</sub> O   | S33 |
| {[Nd <sub>2</sub> (NH <sub>2</sub> -BDC) <sub>3</sub> (DMF) <sub>4</sub> ] <sub>n</sub> }                                                                                      | 0–10 <sup>3</sup>                  | off                 | 359.855                      | 2.495×10 <sup>4</sup>                                                                                                                     | DMF                | S34 |
| [Cd <sub>3</sub> (Htcs) <sub>2</sub> (btap)(H <sub>2</sub> O) <sub>6</sub> ]                                                                                                   | 0–8×10 <sup>4</sup>                | off                 | 1.03×10 <sup>4</sup>         | Cu <sup>2+</sup> /Fe <sup>3+</sup><br>3.25×10 <sup>4</sup> /8.7<br>×10 <sup>3</sup>                                                       | H <sub>2</sub> O   | S35 |
| [Zn(btca)(py) <sub>2</sub> ]                                                                                                                                                   | 0–550                              | off                 | 2.92×10 <sup>4</sup>         | Cu <sup>2+</sup> /PO <sub>4</sub> <sup>3-</sup><br>4.7210×10 <sup>4</sup> /<br>4.738×10 <sup>5</sup>                                      | H <sub>2</sub> O   | S36 |
| [Cd (Ligand)] <sub>2</sub> ·2DMF                                                                                                                                               | 0–9441.98                          | off                 | 4.1 × 10 <sup>3</sup>        | 4.7210×10 <sup>4</sup>                                                                                                                    | DMF                | S37 |
| [Cd(L) <sub>2</sub> ](DMF) <sub>0.92</sub>                                                                                                                                     | 0–500                              | off                 | 4.4×10 <sup>3</sup>          | 6.1373×10 <sup>4</sup>                                                                                                                    | DMF                | S38 |
| Eu <sub>2</sub> (TBrTA) <sub>3</sub> (H <sub>2</sub> O) <sub>8</sub> ·2H <sub>2</sub> O                                                                                        | –                                  | off                 | 4.612×10 <sup>3</sup>        | Cu <sup>2+</sup> /Fe <sup>3+</sup><br>7.52×10 <sup>4</sup> /<br>6.79×10 <sup>4</sup>                                                      | EtOH               | S39 |
| Cd-MOF-74                                                                                                                                                                      | 78.68–<br>1.2589×10 <sup>4</sup>   | off                 | 1.806×10 <sup>3</sup>        | 7.87×10 <sup>4</sup>                                                                                                                      | pH=6.7<br>HEPES    | S40 |
| {NH <sub>2</sub> (CH <sub>3</sub> ) <sub>2</sub> ·Cd <sub>2.5</sub> (L) <sub>2</sub> (H <sub>2</sub> O)·(H <sub>2</sub> O)} <sub>n</sub>                                       | –                                  | off                 | –                            | 1×10 <sup>5</sup>                                                                                                                         | DMSO               | S41 |
| FITC Eu Fe <sub>3</sub> O <sub>4</sub> @ZIF-8                                                                                                                                  | 10 <sup>2</sup> –10 <sup>3</sup>   | ratio<br>metri<br>c | –                            | 1×10 <sup>5</sup>                                                                                                                         | H <sub>2</sub> O   | S42 |
| C <sub>3</sub> N <sub>4</sub> @ZIF-8                                                                                                                                           | 78.68–<br>173.1                    | off                 | –                            | Cu <sup>2+</sup> /Ag <sup>+</sup> /<br>Fe <sup>2+</sup><br>1.7625×10 <sup>5</sup> /1.<br>2237×10 <sup>5</sup> /<br>1.1711×10 <sup>6</sup> | DMF                | S43 |
| [Zn <sub>21</sub> (BTC) <sub>11</sub> (μ <sub>3</sub> -OH) <sub>3</sub> (μ <sub>4</sub> -O) <sub>3</sub> (H <sub>2</sub> O) <sub>18</sub> ] <sub>2</sub> ·21EtOH               | 10 <sup>3</sup> –10 <sup>5</sup>   | off                 | 286.1                        | Cu <sup>2+</sup> /Al <sup>3+</sup><br>1.34×10 <sup>6</sup>                                                                                | CH <sub>3</sub> OH | S44 |
| [Cd(2-aip)(bpy)] <sub>2</sub> ·2DMF                                                                                                                                            | –                                  | off                 | –                            | 1×10 <sup>7</sup>                                                                                                                         | DMF                | S45 |
| Eu <sub>2</sub> (FMA)(OX)(H <sub>2</sub> O) <sub>4</sub> ·4H <sub>2</sub> O                                                                                                    | –                                  | off                 | 528.7                        | –                                                                                                                                         | H <sub>2</sub> O   | S46 |
| {[Tb <sub>4</sub> (μ <sub>3</sub> -OH) <sub>4</sub> (BPDC) <sub>3</sub> (                                                                                                      | –                                  | off                 | 344.9±10.                    | Cu <sup>2+</sup> /CrO <sub>4</sub> <sup>2-</sup>                                                                                          | pH=7               | S47 |

|                                                                                                                                                       |                                          |     |                        |                                    |                  |     |
|-------------------------------------------------------------------------------------------------------------------------------------------------------|------------------------------------------|-----|------------------------|------------------------------------|------------------|-----|
| BPDCA) <sub>0.5</sub> (H <sub>2</sub> O) <sub>6</sub> ]ClO <sub>4</sub> ·<br>5H <sub>2</sub> O <sub>n</sub>                                           |                                          |     | 2                      | —                                  | HEPES            |     |
| [Cd <sub>3</sub> (L) <sub>2</sub> (H <sub>2</sub> O) <sub>5</sub> ]·(H <sub>2</sub> O) <sub>4</sub>                                                   | 0–100                                    | off | 3.65×10 <sup>4</sup>   | —                                  | H <sub>2</sub> O | S48 |
| CPP-16                                                                                                                                                | —                                        | off | 7.8467×10 <sup>3</sup> | —                                  | MeCN             | S49 |
| {[Eu <sub>2</sub> (L <sub>2</sub> ) <sub>2</sub> ]·(H <sub>2</sub> O) <sub>3</sub> ·(Me <sub>2</sub><br>NH <sub>2</sub> ) <sub>2</sub> } <sub>n</sub> | —                                        | off | —                      | Cu <sup>2+</sup> /Fe <sup>2+</sup> | H <sub>2</sub> O | S50 |
| {[Eu <sub>2</sub> (abtc) <sub>1.5</sub> (H <sub>2</sub> O) <sub>3</sub> ·(D<br>MA)]·H <sub>2</sub> O·DMA} <sub>n</sub>                                | 5×10 <sup>2</sup> –<br>5×10 <sup>4</sup> | off | 529                    | —                                  | H <sub>2</sub> O | S51 |

**Table S2.** Determination of Cu<sup>2+</sup> in Real Samples.

| Sample      | initial Cu <sup>2+</sup><br>(nM) | Spiked Cu <sup>2+</sup><br>(nM) | proposed method<br>Cu <sup>2+</sup> (nM) | recovery<br>(%) |
|-------------|----------------------------------|---------------------------------|------------------------------------------|-----------------|
| Tap water 1 | 66.08                            | 0                               | 65.85                                    | 99.65           |
| Tap water 2 | 66.08                            | 24.94                           | 93.17                                    | 102.36          |
| Tap water 3 | 66.08                            | 49.75                           | 115.39                                   | 99.62           |
| River 1     | 83.89                            | 0                               | 82.02                                    | 97.77           |
| River 2     | 83.89                            | 24.94                           | 106.33                                   | 97.70           |
| River 3     | 83.89                            | 49.75                           | 134.13                                   | 100.37          |

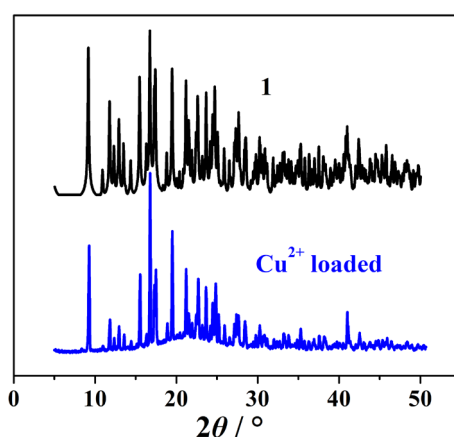

**Fig. S7** PXRD patterns of complex **1** before and after soaking in Cu<sup>2+</sup> solution.

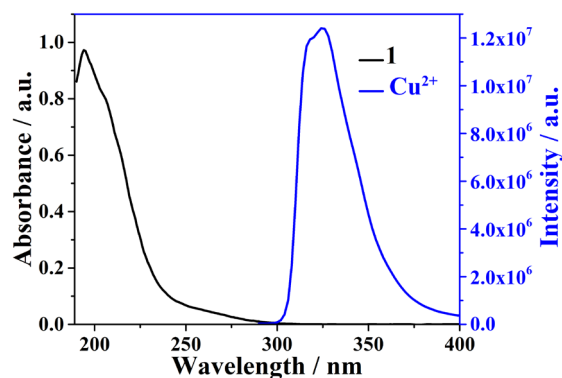

**Fig. S8** Liquid UV-vis spectra of Cu<sup>2+</sup> and emission spectrum of **1** in the aqueous solution.

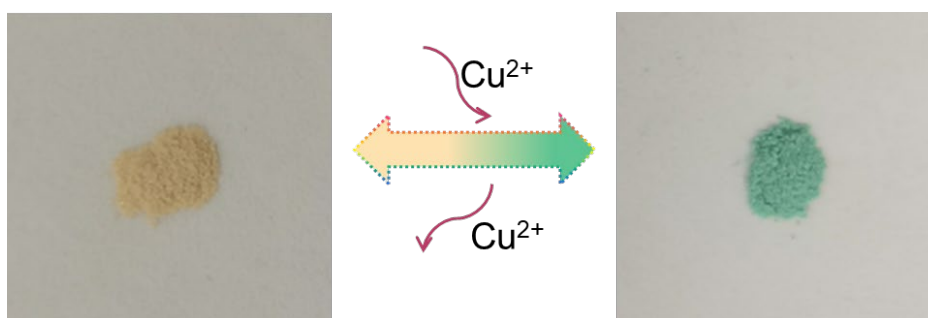

**Fig. S9** Graphical representation of the powder **1** adsorption and desorption of the  $\text{Cu}^{2+}$ .

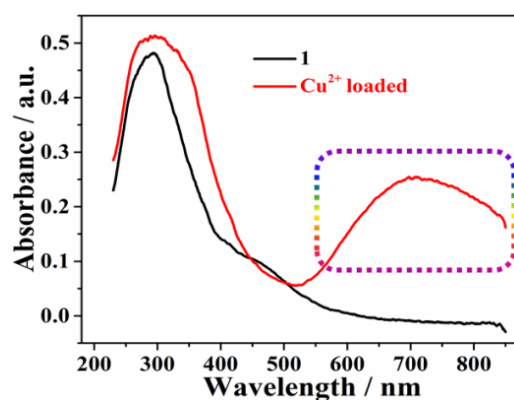

**Fig. S10** UV-Vis DRS of the powder **1** before and after the adsorption of the  $\text{Cu}^{2+}$ .

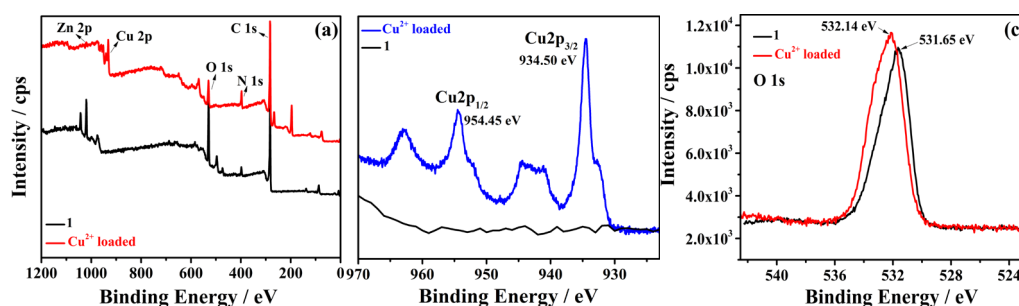

**Fig. S11** (a) XPS patterns of the powder **1** before and after the adsorption of the  $\text{Cu}^{2+}$ . (b) An enlarged image of XPS spectra of Cu 2p. (c) The binding energy of O 1s in **1** before and after the adsorption of the  $\text{Cu}^{2+}$ .

## REFERENCES

- S1. J. Chen, H. Chen, T. Wang, J. Li, J. Wang and X. Lu, *Anal. chem.*, 2019, **91**, 4331-4336.
- S2. X. Lin, G. Gao, L. Zheng, Y. Chi and G. Chen, *Anal. chem.*, 2014, **86**, 1223-1228.
- S3. C. Cheng, R. Zhang, J. Wang, Y. Zhang, C. Wen, Y. Tan and M. Yang, *Analyst*, 2020, **145**, 797-804.
- S4. Y. Song, D. Hu, F. Liu, S. Chen and L. Wang, *Analyst*, 2015, **140**, 623-629.
- S5. Y.Z. Chen and H.L. Jiang, *Chem. Mater.*, 2016, **28**, 6698-6704.
- S6. L. Li, S. Shen, R. Lin, Y. Bai and H. Liu, *Chem. Commun.*, 2017, **53**, 9986-9989.
- S7. Z.F. Wu, E. Velasco, C. Shan, K. Tan, Z.Z. Zhang, Q.Q. Hu, K. Xing, X.Y. Huang and J. Li, *J. Mater.*



- Chem. C.*, 2020, **8**, 6820-6825.
- S8. H. Weng and B. Yan, *Anal. Chim. Acta.*, 2017, **988**, 89-95.
- S9. T. Chu, Y. Hu, J. Wu, C. Zeng, Y. Yang and S. W. Ng, *Photochem. Photobiol. Sci.*, 2016, **15**, 744-751.
- S10. X.X. Peng, G.M. Bao, Y.F. Zhong, J.X. He, L. Zeng and H.Q. Yuan, *Spectrochim. Acta, Part A.*, 2020, **240**, 118621.
- S11. A. Helal, M. Nasiruzzaman Shaikh and M. Abdul Aziz, *J. Photochem. Photobiol. A.*, 2020, **389**, 112238.
- S12. W. Liu, Y. Wang, L. Song, M.A. Silver, J. Xie, L. Zhang, L. Chen, J. Diwu, Z. Chai and S. Wang, *Talanta*, 2019, **196**, 515-522.
- S13. P. Huang, F. Wu and L. Mao, *Anal. chem.*, 2015, **87**, 6834-6841.
- S14. L.Y. Pang, G.P. Yang, J.C. Jin, M. Kang, A.Y. Fu, Y.Y. Wang and Q.Z. Shi, *Cryst. Growth Des.*, 2014, **14**, 2954-2961.
- S15. L.L. Liu, Y.Z. Yu, X.J. Zhao, Y.R. Wang, F.Y. Cheng, M.K. Zhang, J.J. Shu and L. Liu, *Dalton Trans.*, 2018, **47**, 7787-7794.
- S16. J. Luo, B.S. Liu, X.R. Zhang and R.T. Liu, *J. Mol. Struct.*, 2019, **1177**, 444-448.
- S17. L. Hao, H. Song, Y. Su and Y. Lv, *Analyst*, 2014, **139**, 764-770.
- S18. J. Zhao, Y.N. Wang, W.W. Dong, Y.P. Wu, D.S. Li and Q.C. Zhang, *J. Mol. Struct.*, 2016, **55**, 3265-3271.
- S19. H. Zhang, R. Fan, W. Chen, J. Fan, Y. Dong, Y. Song, X. Du, P. Wang and Y. Yang, *Cryst. Growth Des.*, 2016, **16**, 5429-5440.
- S20. J.D. An, T.T. Wang, Y.F. Shi, X.X. Wu, Y.Y. Liu, J.Z. Huo and B. Ding, *J. Mol. Struct.*, 2020, **1216**, 128328.
- S21. S.W. Lv, J.M. Liu, C.Y. Li, N. Zhao, Z.H. Wang and S. Wang, *Chem. Eng. J.*, 2019, **375**, 122111.
- S22. S. Geranmayeh, M. Mohammadnejad and S. Mohammadi, *Ultrason. Sonochem.*, 2018, **40**, 453-459.
- S23. J. Zhang, J. Wu, G. Tang, J. Feng, F. Luo, B. Xu and C. Zhang, *Sens. Actuators, B.*, 2018, **272**, 166-174.
- S24. J. Li, X. Yuan, Y.N. Wu, X. Ma, F. Li, B. Zhang, Y. Wang, Z. Lei and Z. Zhang, *Chem. Eng. J.*, 2018, **350**, 637-644.
- S25. Z. Hao, X. Song, M. Zhu, X. Meng, S. Zhao, S. Su, W. Yang, S. Song and H. Zhang, *J. Mater. Chem. A.*, 2013, **1**, 11043.
- S26. B. Liu, W. P. Wu, L. Hou and Y. Y. Wang, *Chem. Commun.*, 2014, **50**, 8731-8734.
- S27. B. Liu, L. Hou, W. P. Wu, A. N. Dou and Y. Y. Wang, *Dalton Trans.*, 2015, **44**, 4423-4427.
- S28. S. Bhattacharyya, A. Chakraborty, K. Jayaramulu, A. Hazra and T. K. Maji, *Chem. Commun.*, 2014, **50**, 13567-13570.
- S29. W. Dan, X. Liu, M. Deng, Y. Ling, Z. Chen and Y. Zhou, *Dalton Trans.*, 2015, **44**, 3794-3800.
- S30. L.N. Zhang, A.L. Liu, Y.X. Liu, J.X. Shen, C.X. Du and H. W. Hou, *Inorg. Chem. Commun.*, 2015, **56**, 137-140.
- S31. C. Liu and B. Yan, *Sens. Actuators, B.*, 2016, **235**, 541-546.
- S32. S. Roy, O. B. Chanu, S. Sarkar and S. C. Peter, *J. Mater. Chem. C.*, 2016, **4**, 6256-6269.
- S33. C.J. Hu, L. Yu, W.W. Dong, Y.P. Wu, D.S. Li and J. Zhao, *Z. Anorg. Allg. Chem.*, 2019, **645**, 484-489.
- S34. J. Luo, B. S. Liu, C. Cao and F. Wei, *Inorg. Chem. Commun.*, 2017, **76**, 18-21.
- S35. J. Sun, T. Zhou, D. Pan, X. Zhang, Y. Wang, Y.C. Shi and H. Yu, *CrystEngComm.*, 2020, **22**, 534-545.
- S36. Y. Xie, S. Ning, Y. Zhang, Z. Tang, S. Zhang and R. Tang, *Dyes Pigm.*, 2018, **150**, 36-43.

- S37. A. Yousaf, N. Xu, A.M. Arif, J. Zhou, C.Y. Sun, X.L. Wang and Z.M. Su, *Dyes Pigm.*, 2019, **163**, 159-167.
- S38. S. Senthilkumar, R. Goswami, V.J. Smith, H.C. Bajaj and S. Neogi, *ACS Sustainable Chem. Eng.*, 2018, **6**, 10295-10306.
- S39. J.A. Smith, M.A. Singh-Wilmot, K.P. Carter, C.L. Cahill and J.A. Ridenour, *Cryst. Growth Des.*, 2019, **19**, 305-319.
- S40. T. T. Zheng, J. Zhao, Z. W. Fang, M. T. Li, C. Y. Sun, X. Li, X. L. Wang and Z. M. Su, *Dalton Trans.*, 2017, **46**, 2456-2461.
- S41. C. Qiao, X. Qu, Q. Yang, Q. Wei, G. Xie, S. Chen and D. Yang, *Green Chem.*, 2016, **18**, 951-956.
- S42. J. Wang, H. Chen, F. Ru, Z. Zhang, X. Mao, D. Shan, J. Chen and X. Lu, *Chem. Eng. J.*, 2018, **24**, 3499-3505.
- S43. W. Chen, S. Kong, J. Wang, L. Du, W. Cai and C. Wu, *RSC Adv.*, 2019, **9**, 3734-3739.
- S44. Z. Zhou, X. Xing, C. Tian, W. Wei, D. Li, F. Hu and S. Du, *Sci Rep.*, 2018, **8**, 3117.
- S45. H.N. Wang, P.X. Liu, H. Chen, N. Xu, Z.Y. Zhou and S.P. Zhuo, *RSC Adv.*, 2015, **5**, 65110-65113.
- S46. Y. Xiao, Y. Cui, Q. Zheng, S. Xiang, G. Qian and B. Chen, *Chem. Commun.*, 2010, **46**, 5503-5505.
- S47. J.M. Zhou, W. Shi, H.M. Li, H. Li and P. Cheng, *J. Phys. Chem. C.*, 2013, **118**, 416-426.
- S48. J.L. Du, J.P. Gao, C.P. Li, X.Y. Zhang, J.X. Hou, X. Jing, Y.J. Mu and L.J. Li, *RSC Adv.*, 2017, **7**, 49618-49625.
- S49. W. Cho, H. J. Lee, G. Choi, S. Choi and M. Oh, *J. Am. Chem. Soc.*, 2014, **136**, 12201-12204.
- S50. R. Wang, X. Y. Dong, H. Xu, R. B. Pei, M. L. Ma, S. Q. Zang, H. W. Hou and T. C. Mak, *Chem. Commun.*, 2014, **50**, 9153-9156.
- S51. P. Y. Du, W. Gu and X. Liu, *Inorg. chem.*, 2016, **55**, 7826-7828.
